1 **Major Article**

2

3 **Title:** Investigating Transfusion-Related Sepsis using Culture-Independent Metagenomic

4 Sequencing

5

6 **Running Title:** Tracking Septic Transfusions with mNGS

7

8 \*Emily Crawford, PhD<sup>1,2</sup>; \*Jack Kamm, PhD<sup>1</sup>; Steve Miller, MD, PhD<sup>3</sup>; Lucy M. Li, PhD<sup>1</sup>; Saharai  
9 Caldera, BS<sup>1,4</sup>; Amy Lyden, BS<sup>1</sup>; Deborah Yokoe, MD, MPH<sup>4,5</sup>; Amy Nichols, RN, MBA<sup>5</sup>; Nam K.  
10 Tran, PhD<sup>6</sup>; Sarah E. Barnard, MD<sup>6</sup>; Peter M. Conner MD<sup>6</sup>; Ashok Nambiar, MD<sup>3</sup>; Matt S. Zinter,  
11 MD<sup>7</sup>; Morvarid Moayeri MD, PhD<sup>3</sup>; Paula Hayakawa Serpa, BS<sup>1,4</sup>; Brian C. Prince, BS<sup>4</sup>; Jenai  
12 Quan, BS<sup>8</sup>; Rene Sit, BS<sup>1</sup>; Michelle Tan, BS<sup>1</sup>; Maira Phelps, BS<sup>1</sup>; Joseph L. DeRisi, PhD<sup>1,9</sup>;  
13 Cristina M. Tato, PhD, MPH<sup>1</sup>; Charles Langelier, MD, PhD<sup>1,4</sup>

14 \*EC and JK contributed equally to this manuscript

15

16

17 **Affiliations:**

18 <sup>1</sup>Chan Zuckerberg Biohub, San Francisco, CA, USA

19 <sup>2</sup>Department of Microbiology and Immunology, University of California San Francisco, San  
20 Francisco, CA, USA

21 <sup>3</sup>Department of Laboratory Medicine, University of California San Francisco, San Francisco, CA,  
22 USA

23 <sup>4</sup>Division of Infectious Diseases, Department of Medicine, University of California San Francisco,  
24 San Francisco, CA, USA

25 <sup>5</sup>Department of Hospital Epidemiology and Infection Prevention, University of California San  
26 Francisco, San Francisco, CA, USA

27 <sup>6</sup>Department of Pathology and Laboratory Medicine, University of California Davis, Davis, CA,  
28 USA

29 <sup>7</sup>Division of Pulmonary and Critical Care Medicine, Department of Pediatrics, University of  
30 California San Francisco, San Francisco, CA, USA

31 <sup>8</sup>Northwestern University, Feinberg School of Medicine, Chicago, IL, USA

32 <sup>9</sup>Department of Biochemistry and Biophysics, University of California San Francisco, San  
33 Francisco, CA, USA

34

35

36 **Corresponding author:**

37 Charles Langelier, MD, PhD

38 UCSF/Chan Zuckerberg Biohub

39 499 Illinois Street, San Francisco CA, 94158

40 [chaz.langelier@ucsf.edu](mailto:chaz.langelier@ucsf.edu)

41 Phone: (801) 201-5049, Fax: (415) 353-2258

42

43 **Main Point:** Transfusion-transmitted infections cause significant morbidity and are challenging  
44 to prevent and diagnose. We found that culture-independent metagenomic sequencing of blood  
45 products afforded rapid and precise assessment of pathogen identity, abundance and genetic  
46 relatedness, enhancing traditional hospital infection control strategies.

47

48 **Keywords:** Healthcare infections, platelet transfusion, septic transfusion, metagenomic  
49 sequencing, mNGS

50

51 **Abstract word count:** 239

52 **Text word count:** 3132

53

54 **Abstract**

55 **Background.** Transfusion-related sepsis remains an important hospital infection control  
56 challenge. Investigating septic transfusion events is often restricted by the limitations of bacterial  
57 culture in terms of time requirements and low yield in the setting of prior antibiotic  
58 administration.

59 **Methods.** In three Gram-negative septic transfusion cases, we performed mNGS of direct  
60 clinical blood specimens in addition to standard culture-based approaches utilized for infection  
61 control investigations. Pathogen detection leveraged IDSeq, a new open-access microbial  
62 bioinformatics portal. Phylogenetic analysis was performed to assess microbial genetic  
63 relatedness and understand transmission events.

64 **Results.** mNGS of direct clinical blood specimens afforded precision detection of pathogens  
65 responsible for each case of transfusion-related sepsis, and enabled discovery of a novel  
66 *Acinetobacter* species in a platelet product that had become contaminated despite  
67 photochemical pathogen reduction. In each case, longitudinal assessment of pathogen burden  
68 elucidated the temporal sequence of events associated with each transfusion-transmitted  
69 infection. We found that informative data could be obtained from culture-independent mNGS of  
70 residual platelet products and leftover blood specimens that were either unsuitable or  
71 unavailable for culture, or that failed to grow due to prior antibiotic administration. We  
72 additionally developed methods to enhance accuracy for detecting transfusion-associated  
73 pathogens sharing taxonomic similarity to contaminants commonly found in mNGS library  
74 preparations.

75 **Conclusions.** Culture-independent mNGS of blood products afforded rapid and precise  
76 assessment of pathogen identity, abundance and genetic relatedness. Together, these  
77 challenging cases demonstrated the potential for metagenomics to advance existing methods  
78 for investigating transfusion-transmitted infections.

79

## 80 **Introduction**

81           While transfusion-associated infections have globally decreased over the past 50 years,  
82 bacterial contamination of the platelet supply remains a significant public health challenge, with  
83 approximately one in 1,500 – 5,000 units containing detectable organisms[1–5]. Room  
84 temperature storage facilitates more bacterial growth in platelets compared to other blood  
85 products, with skin flora, asymptomatic donor bacteremia, and direct introduction from  
86 environmental sources accounting for the majority of contaminants[3,6]. Even though current  
87 culture-based screening approaches may miss a significant fraction of contaminated units,  
88 clinically reported sepsis occurs in only one in 15,000-100,000 transfusions, presumably due to  
89 frequent concurrent antibiotic administration, low bacterial inoculum, or attribution of transfusion-  
90 related outcomes to a patient's pre-existing infection or illness[3,7].

91           Pathogen-reduction of platelet products using amotosalen, a nucleic acid cross-linking  
92 agent activated by ultraviolet (UV)-A irradiation, has been routinely performed in Europe for over  
93 a decade and recently received United States Food and Drug Administration approval[8].  
94 Photoinactivation is broadly effective against diverse bacterial pathogens, and while failure at  
95 high bacterial loads has been described, few reports of sepsis have been reported following  
96 treatment[9,10].

97           Here we describe three transfusion-related Gram-negative sepsis investigations  
98 including one involving a pathogen-reduced platelet product. For each, we performed  
99 metagenomic next generation sequencing (mNGS) in addition to standard microbiologic  
100 diagnostics and found that mNGS enabled rapid and precise taxonomic identification and  
101 phylogenetic analysis of bacterial isolates, as well as culture-independent assessment of direct  
102 clinical samples.

103

104 **Methods**

105 Ethics Statement

106           Investigations were carried out according to a no-subject-contact study protocol  
107 approved by the UCSF Institutional Review Board (IRB# 17-24056) which permitted analysis of  
108 de-identified leftover clinical microbiology samples from collaborating institutions and  
109 subsequent review of study subjects' electronic medical records. No decisions regarding  
110 antibiotics or other patient-specific treatment interventions were made using sequencing data.

111

112 Microbial culture

113           Patient blood cultures were performed via inoculation into BD Bactec Plus Aerobic and  
114 Lytic Anaerobic media (Becton Dickinson). This same approach was used for residual platelet  
115 transfusion cultures in cases one and three, and for residual red blood cell segment cultures in  
116 case 2. Species identification was performed using MALDI-TOF mass spectrometry (Bruker).  
117 Details on culture time to positivity are described in **Supplemental Table 1**. Sterility testing was  
118 carried out as described in the **Supplemental Methods**.

119

120 Sequencing

121           Sample processing and DNA extraction were carried out as described in the  
122 **Supplemental Methods**. Ten to 100 ng of DNA from each sample was sheared with  
123 fragmentase (New England Biolabs) and used to construct sequencing libraries with the  
124 NEBNext Ultra II Library Prep Kit (New England Biolabs). Adaptor ligated samples underwent  
125 amplification with dual unique indexing primers. Libraries were quantified, pooled, and  
126 underwent paired end 150 base pair sequencing on an Illumina MiSeq or NextSeq 550.  
127 **Supplemental Table 2** lists the number of reads obtained for each sample.

128

129 Bioinformatics and phylogenetic analyses

130           Detection, taxonomic identification, and abundance quantitation of microbes from raw  
131 sequencing reads was first performed using the IDseq pipeline according to described  
132 protocols[11]. To control for background environmental and reagent contaminants, no-template  
133 water control samples were incorporated alongside extracted nucleic acid and carried forward  
134 throughout library preparation and sequencing. Genome assembly was performed by first  
135 trimming the raw sequencing reads in fastq files using TrimGalore[12] and assembling using  
136 Unicycler[13] with default parameters. To identify the closest related species in cases one and  
137 two, BLAST+[14] against the National Center for Biotechnology Information (NCBI) nt database  
138 and the Mash/Mini Hash search via PATRIC[15,16] were employed to analyze assembled and  
139 annotated contiguous sequences (contigs). For case three, sequence type was determined  
140 using SRST2[17]; other *Klebsiella pneumoniae* sequences in NCBI databases belonging to the  
141 same sequence type were found using a Mash/Mini Hash search via PATRIC[15,16].

142           Phylogenetic analysis for case one and case three was used to determine the  
143 relationship between the samples in this study and the most closely related NCBI genomes.  
144 First, trimmed reads were aligned against a reference genome (case one: *A. baumannii*  
145 CP017642.1, case three: *K. pneumoniae* CP015392.1) using Snippy v4.3.6[18]. Then a SNP  
146 alignment was obtained by variant calling using bcftools v1.9[19]. We filtered SNPs with  
147 QUAL<30, and filtered genotypes with major allele depth (FMT/AD) < 10 or major allele  
148 frequency (FMT/AF) < .9. Finally, the maximum likelihood phylogeny based on the SNP  
149 alignments was built in RAxML v8.2.12[20] using '-m ASC\_GTRCAT --asc-corr=lewis' options.

150

151

152 **Results**

153

154 **Investigation #1: *Acinetobacter* septic platelet transfusion**

155 Patient A, a 59 year old man with relapsed acute lymphoblastic leukemia undergoing  
156 chemotherapy, received two doses of pathogen-reduced apheresis platelets on the day of  
157 planned home discharge. No side effects were experienced after transfusion of the first platelet  
158 unit, however after receiving the second unit two hours later, he developed chills and rigors  
159 followed by fever and critical hypotension. He received fluids and vancomycin before being  
160 transferred to the intensive care unit where meropenem, vasopressors, respiratory support and  
161 continuous renal replacement therapy were administered. He recovered fully and was  
162 discharged home 16 days later on parenteral antibiotics.

163 Blood cultures obtained 4.5 hours post-transfusion returned positive for *Acinetobacter*  
164 *calcoaceticus/baumanii* (*ACB*) complex. Residual material obtained from a saline rinse of the  
165 returned platelet bag also grew *ACB* complex as well as *Staphylococcus saprophyticus*. Culture  
166 of a non-transfused platelet co-component from the same donor, concurrently pathogen-  
167 inactivated with the transfused product five days earlier, was negative. At the time of the  
168 investigation, hypotheses considered included failure of the pathogen-reduction process,  
169 contamination of the pathogen-reduced platelet bag during transport, or pre-existing sub-clinical  
170 bacteremia in the patient.

171 To investigate this case further, we first sequenced the cultured *ACB* complex isolate  
172 from the patient's blood and the *ACB* complex isolate from a wash of the transfused platelet  
173 bag. In total, sequencing and analysis for this case was performed in 45 hours. *De novo*  
174 genome assembly revealed a novel *Acinetobacter* species most closely related (92% average  
175 nucleotide identity) to *A. nosocomialis* and *A. pittii*, members of the *ACB* complex (**Figure 1A**).  
176 Phylogenetic analysis revealed zero single nucleotide polymorphisms (SNPs) over the 3.9 Mb

177 genome between the novel *Acinetobacter* species cultured from the blood and from the platelet  
178 bag, indicating that the two isolates were identical.

179 Culture-independent mNGS detected a high abundance of *ACB complex* in the  
180 transfused product (230,000 reads per million, rpM) and in the patient's plasma following  
181 transfusion (190 rpM) (**Figure 1B**), as determined by summing the reads found by IDSeq  
182 aligning to species within the *ACB complex* (NCBI taxid 909768) which includes *A.*  
183 *calcoaceticus*, *A. baumannii*, *A. nosocomialis* and *A. pittii* among others. By comparison, the  
184 untransfused co-components and patient's plasma before transfusion had very few alignments  
185 to *ACB complex*, in the range of expected background levels (0.25 and 2.2 rpM, respectively).  
186 Assessment of these low abundance alignments at the species level revealed that they most  
187 likely represented mis-assigned reads from other *Acinetobacter* species, notably *A. johnsonii*.  
188 More specifically, the co-components and pre-transfusion samples had only a small percentage  
189 of *Acinetobacter* genus reads that best aligned to an *ACB species*, while in the transfused  
190 product and post-transfusion samples, the vast majority of genus *Acinetobacter* reads aligned to  
191 *ACB species* (**Supplemental Figure 1A**). The orders-of-magnitude difference in percent reads  
192 mapping to *ACB complex*, along with the change in composition of *Acinetobacter* assignments  
193 between samples, indicated that only the transfused product and patient's post-transfusion  
194 plasma were contaminated by a species within the *ACB complex*. Although the sequence of the  
195 cultured isolate in this case allowed us to properly identify the strain phylogenetically, it was not  
196 required to complete the mNGS analysis that distinguished pathogen and environmental  
197 contaminant.

198

199

## 200 **Investigation #2: Fatal *Pseudomonas aeruginosa* septic transfusion**

201 Patient B, a 77 year old man, was admitted for management of acute on chronic heart  
202 failure and implantation of a right ventricular assist device. During surgery, he received three



203 units of platelets, three units of fresh frozen plasma, and two units of cross-matched packed red  
204 blood cells (PRBCs). Intraoperatively, the patient became hemodynamically unstable. Cultures  
205 drawn three hours post-surgery ultimately returned positive for *Pseudomonas aeruginosa*,  
206 raising concern for a septic transfusion reaction (**Figure 2**).

207         Despite administration of antipseudomonal antibiotics, the patient's clinical stability  
208 continued to deteriorate, and he did not survive beyond post-operative day three. mNGS was  
209 retrospectively performed on plasma samples collected pre- and post-transfusion from the  
210 patient, on aliquots from the blood culture bottles that eventually turned positive, and on residual  
211 packed red blood cells (PRBCs) remaining following transfusion. Following receipt of samples  
212 from the affected hospital, library preparation, sequencing and preliminary analysis time totaled  
213 72 hours. No remaining material from the platelets or transfused plasma was available for  
214 mNGS or other diagnostic testing. Cultured bacterial isolates were unavailable for sequencing.

215         mNGS revealed no *P. aeruginosa* in the pre-transfusion plasma sample nor in the  
216 residual PRBCs, but identified a high abundance of *P. aeruginosa* in post-transfusion plasma  
217 (**Figure 2**) that decreased over time in the setting of antibiotic treatment. Serial measurement of  
218 procalcitonin demonstrated a normal pre-transfusion level (0.034 ng/mL, reference interval:  
219 <0.15 ng/mL) but significantly elevated concentrations following surgery (range: 42.73 to >100  
220 ng/mL [above detection limit]). Phylogenetic analysis indicated strong relatedness to *P.*  
221 *aeruginosa* strain BWHPA041.

222         Several environmentally ubiquitous *Pseudomonas* species are common contaminants of  
223 mNGS library preparation reagents and thus we used IDSeq[11] to determine the percent of  
224 *Pseudomonas* genus reads that mapped specifically to *P. aeruginosa*. In all six post-transfusion  
225 plasma samples, as well as the blood culture bottle samples, over 99% of genus *Pseudomonas*  
226 reads mapped best to *P. aeruginosa*, while in water controls an average of 7.2% (range 0-  
227 12.1%) mapped best to *P. aeruginosa* (**Supplemental Figure 1B**). This result indicated that the

228 *P. aeruginosa* observed in the post-transfusion plasma samples was not the result of  
229 contamination from mNGS library preparation reagents.

230

### 231 **Investigation #3: Fatal *Klebsiella* septic platelet transfusion**

232 Two immunocompromised pediatric patients, 2 and 3 years of age, developed septic  
233 shock following transfusion of platelets derived from a single donor, as recently reported[6].  
234 Patient C, who had undergone successful autologous hematopoietic stem cell transplantation,  
235 developed hypotension, tachycardia and vomiting 15 minutes into the transfusion. Despite  
236 initiation of vancomycin and cefepime, fluid resuscitation, vasopressor support and intubation,  
237 he died within five hours. Blood cultures ultimately returned positive for *Klebsiella pneumoniae*,  
238 as did a culture from residual material in the platelet bag.

239 Five hours earlier, Patient D, who was receiving empiric cefepime for neutropenic fever,  
240 had undergone transfusion with the second platelet unit derived from the same donor. He  
241 decompensated into septic shock nine hours following transfusion but ultimately survived  
242 following fluid resuscitation and vasopressor support. Blood cultures remained negative in the  
243 setting of concurrent antibiotic treatment, initially precluding determination of whether sepsis  
244 was due to a *Klebsiella*-contaminated platelet transfusion or to another etiology.

245 Culture-independent mNGS of pre- and post-transfusion plasma or serum samples  
246 revealed a marked increase in *Klebsiella pneumoniae* following transfusion in both patients,  
247 although patient D, who had negative blood cultures, had 12.9-fold fewer *Klebsiella* rpM  
248 detected compared to patient C (**Figure 3**). Genome assembly and phylogenetic analysis  
249 revealed only one SNP across the 4.2 Mb core genome of *K. pneumoniae* among Patient C's  
250 plasma sample, Patient C's blood culture isolate, and the residual platelet bag culture isolate.  
251 The residual platelet product in the bag given to Patient D was discarded by the hospital nursing  
252 staff and unavailable for either culture or mNGS. Across approximately 2700 bases of the *K.*  
253 *pneumoniae* genome detected in Patient D's plasma with a read depth greater than 10, zero

254 SNPs relative to the other three samples were identified. The sequence type of *K. pneumoniae*  
255 in all four samples was determined to be ST491, and the closest ST491 sequence on Genbank  
256 differed from these sequences by 212 SNPs.

257 Together these data confirmed that the platelet unit represented a single source of  
258 infection and that despite Patient D having negative blood cultures, both patients became  
259 bacteremic with the same strain of *K. pneumoniae* transfused from the contaminated platelet  
260 components. As previously reported, routine culture-based screening of the donor's platelets at  
261 24 hours performed by the blood supplier remained negative at five days, although an additional  
262 platelet unit from the same donor shipped to a different hospital and quarantined before  
263 transfusion grew *K. pneumoniae* that was highly related based on whole genome sequencing  
264 analysis[6].

## 265 **Discussion**

266 Bacterial contamination of platelet products remains an important and underrecognized  
267 hospital infection control challenge despite existing screening methods and psoralen-based  
268 pathogen-reduction strategies[1–5]. Rapid recognition of potential transfusion-associated sepsis  
269 can permit quarantine of untransfused co-components from a potentially contaminated supply  
270 chain and assist with root cause analysis. Traditionally, culture-based methods including pulsed-  
271 field gel electrophoresis and more recently, whole genome sequencing, have been the central  
272 diagnostic tools for septic transfusion investigations. Here, we found that culture-independent  
273 mNGS extended the utility of these methods by directly detecting pathogens from clinical  
274 samples to assess genetic relatedness, obtain precise strain information, and interrogate levels  
275 of pathogen in a patient's bloodstream throughout the course of a septic transfusion event.

276 In each case examined, mNGS provided detailed and precise information that clarified  
277 the sequence of events resulting in transfusion-related sepsis. In case one, for example,  
278 potential explanations considered included: 1) failure of the pathogen inactivation process; 2)  
279 contamination of the platelet bag from an environmental source after pathogen reduction; and 3)

280 pre-existing occult bacteremia resulting in retrograde introduction of bacteria into the platelet  
281 bag during transfusion. Temporal mNGS assessment of patient plasma demonstrated abundant  
282 *Acinetobacter* DNA in post-transfusion samples and in washes of the transfused platelet bag,  
283 but not in any pre-transfusion samples, consistent with a septic transfusion event and not pre-  
284 existing bacteremia.

285         The findings of high abundance *Acinetobacter sp.* in the transfused unit but not  
286 untransfused co-components suggested that contamination occurred following pathogen  
287 reduction treatment, potentially from an environmental source during product handling, transport  
288 or storage. Transfusion-related sepsis from pathogen-reduced platelet products has been  
289 reported but is extremely rare[9,10]. This case suggests that pathogen reduction technology  
290 should still be accompanied by rigorous infection control precautions during downstream  
291 processing and potentially undergo the same culture-based sterility testing as other platelet  
292 products. Discovery that the implicated pathogen in case one represented a novel species of  
293 *Acinetobacter* also highlighted the unique ability of sequencing-based diagnostics for unbiased  
294 microbe discovery.

295         In case two, the possibility of an occult but developing bloodstream infection present  
296 prior to transfusion was also considered as a potential explanation for the patient's post-surgical  
297 sepsis. As in case one, assessment of plasma samples collected before and after transfusion  
298 clarified the sequence of events and demonstrated that *P. aeruginosa* was only detectable post-  
299 transfusion. Evidence for a septic transfusion event was further corroborated by temporal  
300 measurement of procalcitonin, a host inflammatory biomarker with specificity for bacterial  
301 infection[22,23]. Post-transfusion procalcitonin levels above the upper limit of detection in the  
302 context of normal pre-surgical levels provided further evidence that a septic transfusion event  
303 had occurred. The absence of detectable *P. aeruginosa* in the transfused PRBC segments  
304 suggested that platelets or plasma may have been the source of contamination, although  
305 neither sample type was available for confirmation.

306 All three cases notably demonstrated that mNGS afforded high resolution taxonomic  
307 identification without a need to isolate a pathogen in culture. This allowed for post-hoc analyses  
308 of banked clinical specimens obtained both pre- and post-transfusion that were either unsuitable  
309 or unavailable for culture. For instance, even though no cultured isolates were available in case  
310 two, direct mNGS of leftover blood products allowed for precise identification of the most closely  
311 related *Pseudomonas aeruginosa* strain, which incidentally was recovered in 2013 from a  
312 patient's wound in Massachusetts, USA.

313 Confirming transmission of a pathogen during septic transfusion events is essential for  
314 hospital infection control, but in some cases is not possible because culture fails to identify a  
315 microbe. This problem was highlighted by case three, in which blood cultures from patient D  
316 remained negative despite the development of post-transfusion septic shock. Patient D was  
317 receiving a prophylactic antibiotic with activity against *Klebsiella*, which likely inhibited bacterial  
318 growth in culture, precluding definite confirmation of a septic transfusion event related to that  
319 experienced by Patient C. Culture-independent mNGS not only confirmed the presence of *K.*  
320 *pneumoniae* in the blood of both patients but also established that it was identical to the isolate  
321 derived from transfused platelet product. This unfortunate fatal transfusion case demonstrated  
322 the capability of mNGS to provide definitive confirmation and characterization of septic  
323 transfusion events in cases where culture fails to yield an isolate.

324 *Acinetobacter* and *Pseudomonas* are environmentally ubiquitous and common  
325 contaminants of mNGS and 16S rRNA gene sequencing library preparation reagents[21,24],  
326 and as such can add considerable complexity to investigations in which accurately assessing  
327 the abundance of transfused pathogens belonging to these genera is critical. To address this,  
328 we employed two complementary approaches that may be broadly useful for future  
329 investigations: 1) assessing compositional changes of species within the relevant genus as a  
330 proxy for environmental contamination, and 2) focusing analysis exclusively on the exact  
331 species implicated in the transfusion event. In case one, for example, these approaches

332 clarified that the novel *Acinetobacter* species was present only in the residual transfused  
333 product and in the patient's plasma following transfusion, but not in the other co-components  
334 nor in the patient's bloodstream prior to the event. In case two, the lack of a *Pseudomonas*  
335 cultured isolate limited our ability to perform phylogenetic analyses, but mNGS clearly identified  
336 the most closely related species to the causative agent and exhibited a stark compositional  
337 difference between the pre- and post-transfusion samples, demonstrating that metagenomic  
338 bioinformatics tools like IDSeq can make species-level assignments of individual reads or  
339 contigs even in the absence of culture-based whole genome sequencing.

340         Rapid assessment of septic transfusion events is critical to ensure related contaminated  
341 products can be swiftly quarantined, and probable sources of contamination identified. We  
342 found that mNGS and pathogen analysis could be reliably performed in under 48 hours, faster  
343 than the turnaround time for blood culture at many institutions. Cost, time and infrastructure  
344 requirements currently make sequencing impractical at many healthcare institutions, however  
345 new platforms such as the Illumina iSeq and Oxford Nanopore Minion will undoubtedly increase  
346 the broad applicability of this technology for rapid hospital epidemiologic investigations.

347         As genomic approaches become more widely used for investigating transfusion-related  
348 infections, rapid exchange of pathogen genomic information via open access databases could  
349 accelerate identification of related cases, enhancing infection control efforts of emerging  
350 outbreaks. Indeed, the findings described here have contributed to a multicenter United States  
351 Centers for Disease Control and Prevention investigation which has identified the novel  
352 *Acinetobacter* sp. from Patient A in related cases from Utah and Connecticut[25].

353         In summary, transfusion-related sepsis continues to cause excess mortality and  
354 morbidity despite the introduction of pathogen-reduction technologies. We found that culture-  
355 independent mNGS complemented current best available methods for investigation of  
356 transfusion-related sepsis by extending traditional whole genome sequencing-based  
357 phylogenetics of cultured isolates and by permitting longitudinal assessment of pathogen

358 abundance pre- and post-transfusion from direct clinical specimens. While additional studies are  
359 needed to validate these methods, implementation of mNGS for both investigation and  
360 prevention of transfusion-related infections may enhance existing practices.

361 **Data Availability**

362 Raw sequencing data is available via NCBI BioProject Accession ID: PRJNA544865.

363

364 **Funding:**

365 This work was funded by the National Heart, Lung and Blood Institute [grant number  
366 K23HL138461-01A1].

367

368 **Conflicts of Interest Statement:**

369 The authors declare no conflicts of interest regarding the publication of this manuscript.

370

371 **Acknowledgements**

372 We thank Norma Neff for her guidance on metagenomic sequencing methodology and PK for  
373 his support and input on the study. We thank Amy Kistler and Renuka Kumar for their efforts  
374 with data analysis and sample processing. We thank Michael Busch for sharing his expertise in  
375 evaluating transfusion-transmitted infections.

376

377 **Authorship Contributions**

378 C.L., E.C., J.K. and S.M. wrote the paper

379 J.K. and L.L. performed phylogenetic analyses

380 C.L., E.C., J.K., L.L. and PC performed additional data analyses

381 A.N., A.N., D.Y., M.M., M.Z., N.T. and S.B. directed clinical aspects of the investigations

382 C.T. and J.D. directed molecular aspects of the investigations

383 A.L., B.P., C.L., E.C., P.H., and J.Q. performed sample extractions and metagenomic library  
384 preparation

385 M.P. served as clinical research coordinator

386 M.T. and R.S. performed sequencing and quality control

387



388 **References**

- 389 1. Eder AF, Dy BA, DeMerse B, et al. Apheresis technology correlates with bacterial  
390 contamination of platelets and reported septic transfusion reactions: APHERESIS  
391 TECHNOLOGY AND BACTERIAL CONTAMINATION OF PLTs. *Transfusion (Paris)* **2017**;  
392 57:2969–2976.
- 393 2. Kaufman RM, Assmann SF, Triulzi DJ, et al. Transfusion-related adverse events in the  
394 Platelet Dose study. *Transfusion (Paris)* **2015**; 55:144–153.
- 395 3. Busch MP, Bloch EM, Kleinman SH. Prevention of transfusion transmitted infections. *Blood*  
396 **2019**;
- 397 4. Tormey CA, Sweeney JD, Champion MH, Pisciotto PT, Snyder EL, Wu Y. Analysis of  
398 transfusion reactions associated with prestorage-pooled platelet components. *Transfusion*  
399 (Paris) **2009**; 49:1242–1247.
- 400 5. Kuehnert MJ, Roth VR, Haley NR, et al. Transfusion-transmitted bacterial infection in the  
401 United States, 1998 through 2000. *Transfusion (Paris)* **2001**; 41:1493–1499.
- 402 6. Horth RZ, Jones JM, Kim JJ, et al. Fatal Sepsis Associated with Bacterial Contamination of  
403 Platelets — Utah and California, August 2017. *MMWR Morb Mortal Wkly Rep* **2018**;  
404 67:718–722.
- 405 7. Fuller AK, Uglich KM, Savage WJ, Ness PM, King KE. Bacterial culture reduces but does not  
406 eliminate the risk of septic transfusion reactions to single-donor platelets. *Transfusion*  
407 (Paris) **2009**; 49:2588–2593.

- 408 8. Lin L, Dikeman R, Molini B, et al. Photochemical treatment of platelet concentrates with  
409 amotosalen and long-wavelength ultraviolet light inactivates a broad spectrum of  
410 pathogenic bacteria. *Transfusion (Paris)* **2004**; 44:1496–1504.
- 411 9. Schmidt M, Hourfar MK, Sireis W, et al. Evaluation of the effectiveness of a pathogen  
412 inactivation technology against clinically relevant transfusion-transmitted bacterial strains:  
413 EFFICIENCY OF PATHOGEN INACTIVATION. *Transfusion (Paris)* **2015**; 55:2104–2112.
- 414 10. Benjamin RJ, Braschler T, Weingand T, Corash LM. Hemovigilance monitoring of platelet  
415 septic reactions with effective bacterial protection systems: HEMOVIGILANCE FOR  
416 TRANSFUSION SEPSIS. *Transfusion (Paris)* **2017**; 57:2946–2957.
- 417 11. Ramesh A, Nakielny S, Hsu J, et al. Etiology of fever in Ugandan children: identification of  
418 microbial pathogens using metagenomic next-generation sequencing and IDseq, a  
419 platform for unbiased metagenomic analysis. **2018**; Available at:  
420 <http://biorxiv.org/lookup/doi/10.1101/385005>. Accessed 3 November 2018.
- 421 12. TrimGalore. Available at: <https://github.com/FelixKrueger/TrimGalore>.
- 422 13. Wick RR, Judd LM, Gorrie CL, Holt KE. Unicycler: Resolving bacterial genome assemblies  
423 from short and long sequencing reads. *PLOS Comput Biol* **2017**; 13:e1005595.
- 424 14. Camacho C, Coulouris G, Avagyan V, et al. BLAST+: architecture and applications. *BMC*  
425 *Bioinformatics* **2009**; 10:421.
- 426 15. Ondov BD, Treangen TJ, Melsted P, et al. Mash: fast genome and metagenome distance  
427 estimation using MinHash. *Genome Biol* **2016**; 17. Available at:  
428 <http://genomebiology.biomedcentral.com/articles/10.1186/s13059-016-0997-x>. Accessed  
429 21 March 2019.

- 430 16. Wattam AR, Abraham D, Dalay O, et al. PATRIC, the bacterial bioinformatics database and  
431 analysis resource. *Nucleic Acids Res* **2014**; 42:D581–D591.
- 432 17. Inouye M, Dashnow H, Raven L-A, et al. SRST2: Rapid genomic surveillance for public  
433 health and hospital microbiology labs. *Genome Med* **2014**; 6:90.
- 434 18. Snippy. Available at: <https://github.com/tseemann/snippy/releases>.
- 435 19. bcftools v1.9. Available at: <https://github.com/samtools/bcftools>.
- 436 20. Stamatakis A. RAxML version 8: a tool for phylogenetic analysis and post-analysis of large  
437 phylogenies. *Bioinforma Oxf Engl* **2014**; 30:1312–1313.
- 438 21. Wilson MR, O'Donovan BD, Gelfand JM, et al. Chronic Meningitis Investigated via  
439 Metagenomic Next-Generation Sequencing. *JAMA Neurol* **2018**; 75:947–955.
- 440 22. Vijayan AL, Vanimaya null, Ravindran S, et al. Procalcitonin: a promising diagnostic marker  
441 for sepsis and antibiotic therapy. *J Intensive Care* **2017**; 5:51.
- 442 23. Liu D, Su L, Han G, Yan P, Xie L. Prognostic Value of Procalcitonin in Adult Patients with  
443 Sepsis: A Systematic Review and Meta-Analysis. *PLOS ONE* **2015**; 10:e0129450.
- 444 24. Salter SJ, Cox MJ, Turek EM, et al. Reagent and laboratory contamination can critically  
445 impact sequence-based microbiome analyses. *BMC Biol* **2014**; 12. Available at:  
446 <https://bmcbiol.biomedcentral.com/articles/10.1186/s12915-014-0087-z>. Accessed 10 May  
447 2019.
- 448 25. Jones SA, Jones, JM, Leung V, Nakashima AK, Oakeson KF, Simth AR, Hunter R, Kim JJ,  
449 Cumming M, McHale E, Young PP, Fridey JL, Kelley WE, Stramer SL, Wagner SJ, West  
450 FB, Heron R, Snyder E, Hendrickson J, Peaper DR, Gundlapalli AV, Langelier C, Miller S,

451 Nambiar A, Moayeri M, Kamm J, Moulton-Meissner, H, Annambhotla P, Gable P,  
452 McAllister GA, Breaker E, Sula E, Halpin AL, Basavaraju SV. Septic Transfusion Reactions  
453 Attributed to Bacterial Contamination of Platelets Associated with a Potential Common  
454 Source — Multiple States, 2018. MMWR Morb Mortal Wkly Rep **2019**;  
455  
456

457 **Figure Legends**

458 **Figure 1. *Acinetobacter* septic transfusion investigation**

459 **A)** Maximum likelihood phylogenetic tree based on SNP alignments demonstrates relatedness  
460 of the novel *Acinetobacter* species isolated from both patient A and the residual transfused  
461 platelet product relative to closely related species within the *Acinetobacter*  
462 *calcoaceticus/baumannii* (ACB) complex. **B)** Abundance of ACB complex in the transfused  
463 platelet product and co-components (left panel) and in patient A's plasma (right panel),  
464 determined by culture-independent metagenomic sequencing and measured in reads per  
465 million, rpM.

466

467 **Figure 2. *Pseudomonas* septic transfusion investigation**

468 Abundance of *Pseudomonas aeruginosa* in patient B's plasma throughout the course of the fatal  
469 septic transfusion event, determined by culture-independent metagenomic sequencing and  
470 measured in reads per million (rpM, lower panel). Procalcitonin level (ng/mL) over the course of  
471 the septic transfusion event is plotted in the upper panel.

472

473 **Figure 3. *Klebsiella* septic transfusion investigation**

474 Abundance of *Klebsiella pneumoniae* in plasma from patients C (upper panel) and D (lower  
475 panel) during the course of related septic transfusion events, as determined by culture-  
476 independent metagenomic sequencing and measured in reads per million (rpM). Patient C, who  
477 did not survive the event, had post-transfusion blood cultures return positive for *K. pneumoniae*  
478 that was highly related (1 SNP across the 4.2 Mb core genome) to the *K. pneumoniae* isolated  
479 from the residual transfused platelet product. Patient D, who was receiving antibiotics with  
480 activity against *Klebsiella* prior to transfusion, survived, but had negative post-transfusion blood  
481 cultures, precluding definitive confirmation of a related second septic transfusion event in the  
482 absence of culture-independent metagenomic sequencing.

# Figure 1

## A

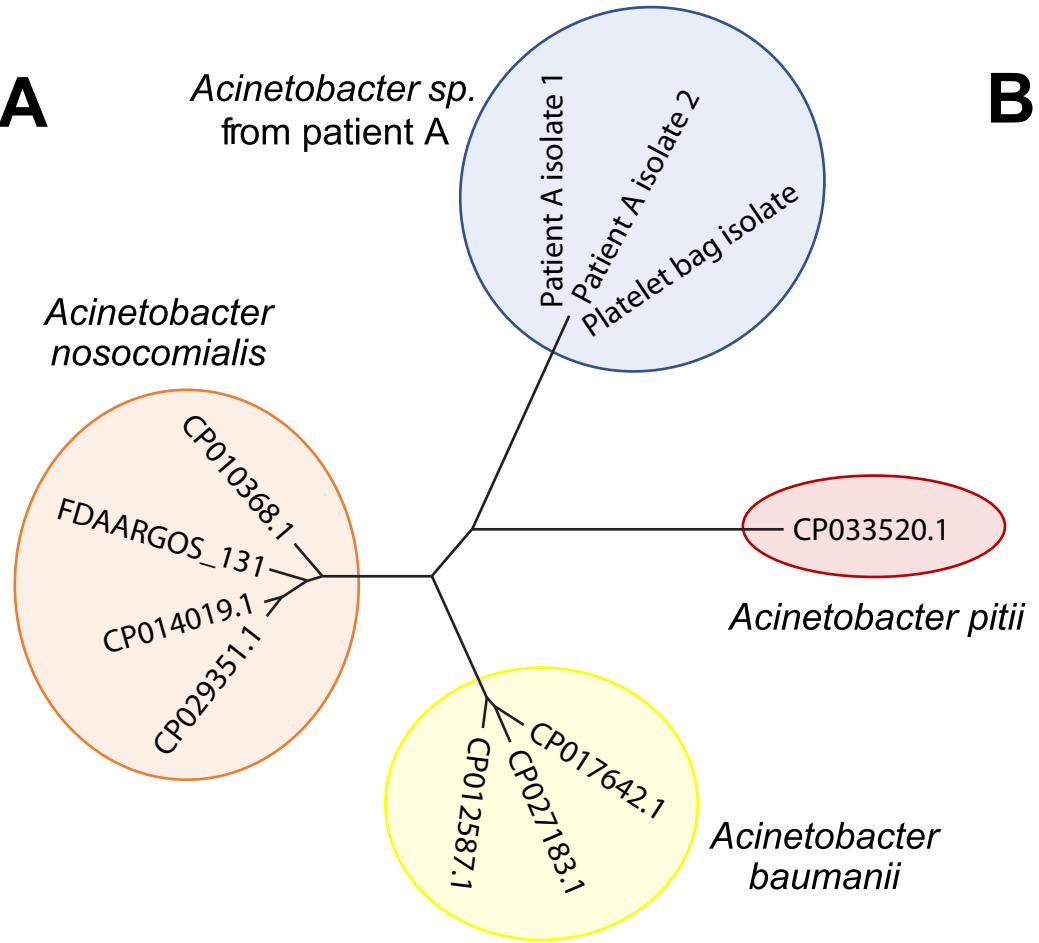

## B

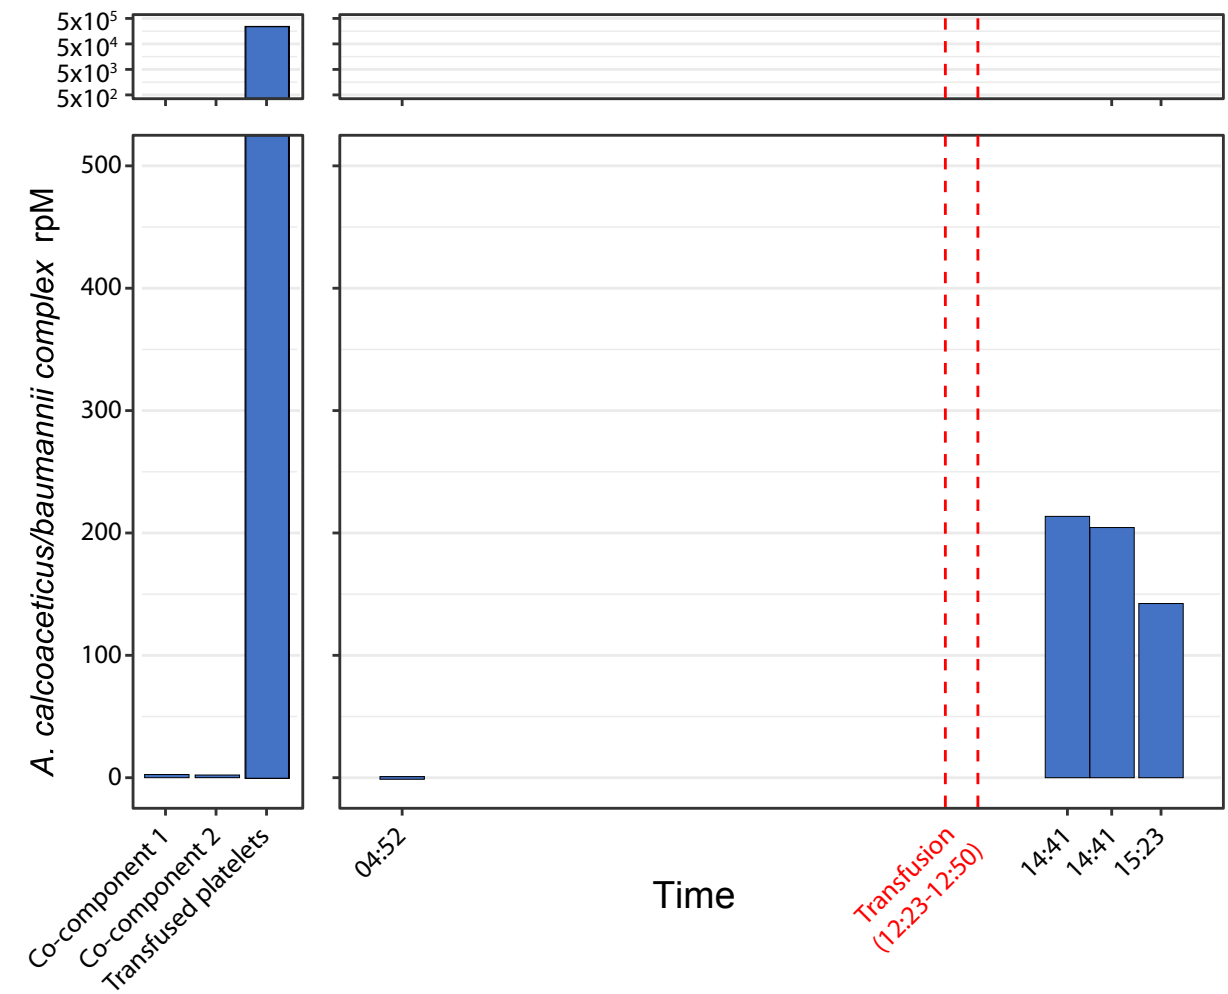

# Figure 2

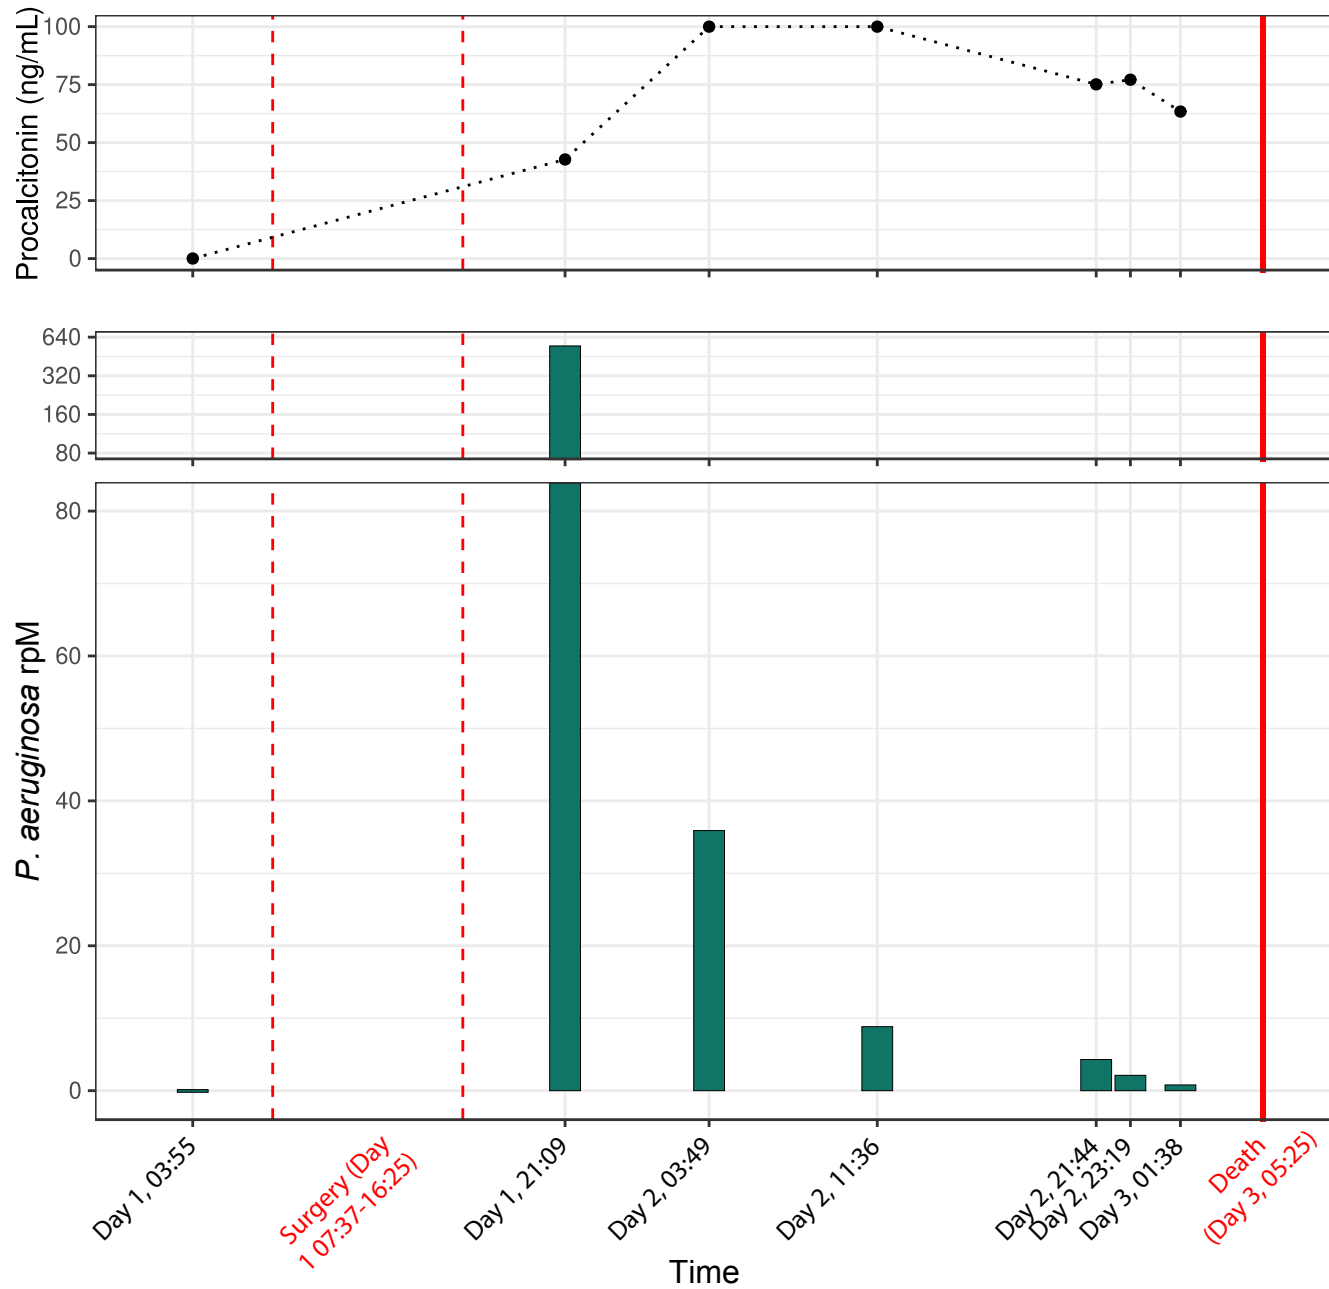

# Figure 3

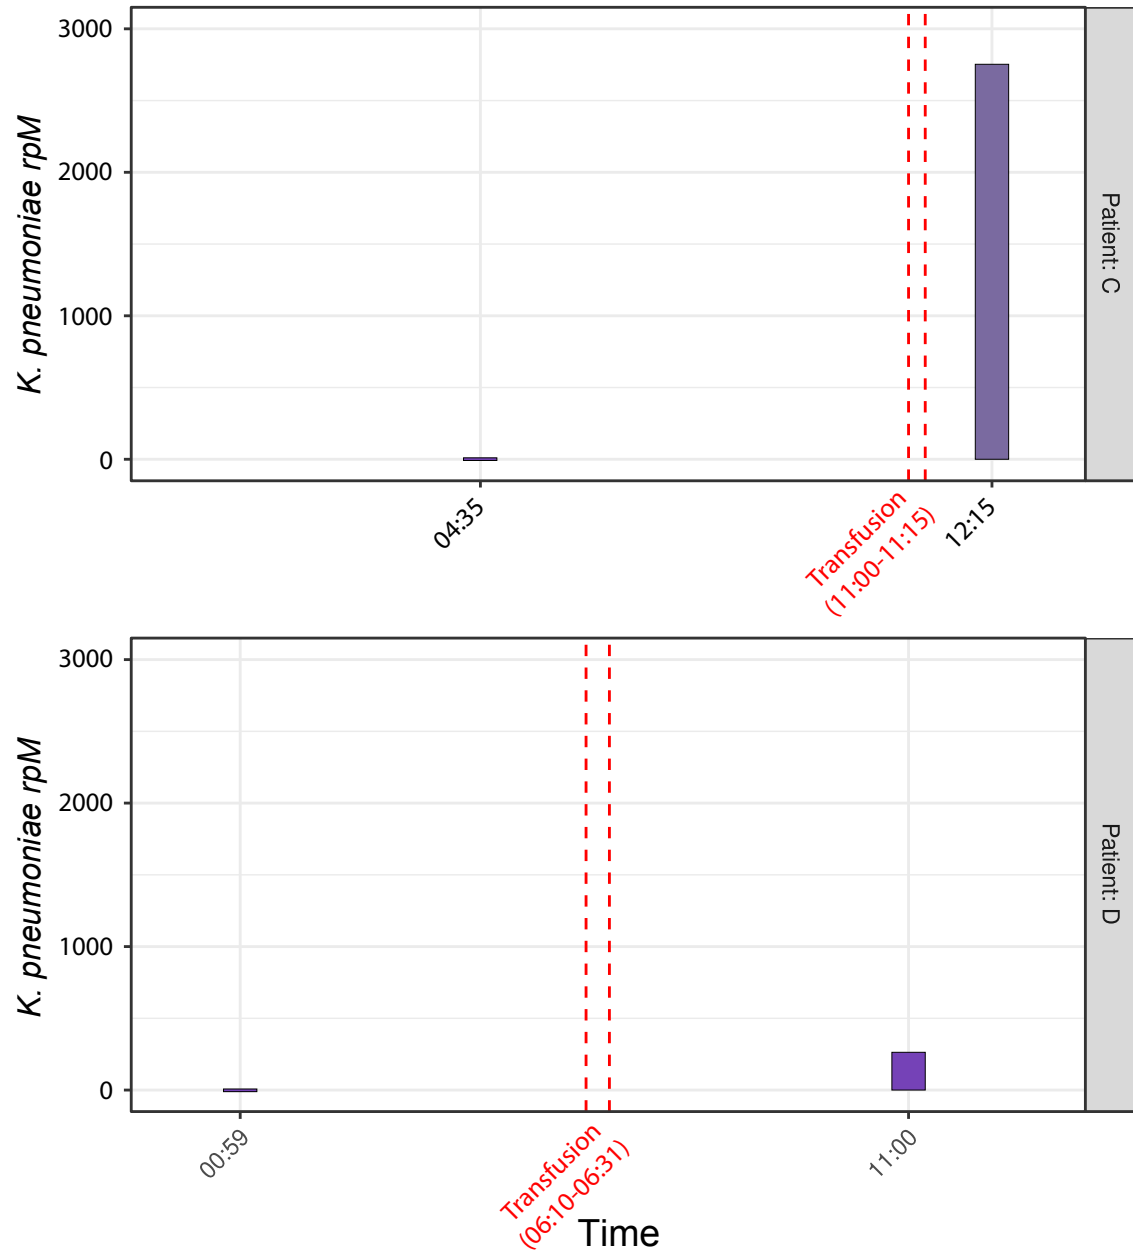



## **Investigating Transfusion-Related Sepsis using Culture-Independent Metagenomic Sequencing, Supplemental Materials**

### **Supplemental Methods**

#### Sample Processing and Nucleic Acid Extraction

Samples were inactivated by adding DNA/RNA Shield (Zymo) and bashed with ceramic beads on a TissueLyser (Qiagen) for either two minutes at  $15s^{-1}$  or one minute at  $30s^{-1}$ . For case one, metagenomic samples were extracted with the Quick-DNA/RNA Miniprep Kit (Zymo) and cultured isolate samples were extracted with the Quick DNA Fungal/Bacterial kit (Zymo). Case two samples were extracted with the Quick-DNA/RNA Microprep Plus kit (Zymo). For case three, metagenomic samples were extracted with the Duet DNA/RNA kit (Zymo) and cultured isolate samples were extracted with the AllPrep DNA/RNA kit (Qiagen) on a Qiacube robot.

#### Sterility Testing

The United States Food and Drug Administration (FDA) does not require primary culture testing for pathogen-reduced platelet products, as such no sterility testing was done for the platelet products from case 1. For the remaining cases, apheresis platelet products were subjected to sterility testing by the blood supplier using a standard FDA-approved automated culture methods and protocol. This involved culture performed by the blood supplier 24 hours after collection of the donor's platelets. Eight mL of platelet product was inoculated into an aerobic BacT bottle and incubated at 37 degrees Celsius for 5 days. In case 3, The BacT bottle remained negative at the end of 5 days of incubation. False negativity is a known limitation of culture-based platelet sterility testing and may reflect low levels of inoculum at the time of platelet collection that are not picked up by sampling a small volume of product. Transfusion services are not currently required to perform additional cultures or point of release tests for bacterial contamination prior to issuing platelets to patients. Plasma products are not subjected to sterility testing by the blood supplier or by the transfusion service.

### Supplemental Table 1: Microbial Culture Data

| <b>Case</b> | <b>Pathogen</b>      | <b>Culture type</b>      | <b>Time to positivity</b> | <b>Time to AST reporting</b> |
|-------------|----------------------|--------------------------|---------------------------|------------------------------|
| 1           | <i>Acinetobacter</i> | Product initial wash     | 14h 41m                   | 66h 39m                      |
| 1           | <i>Acinetobacter</i> | Product repeat wash      | 6h 58m                    | 59h 46m                      |
| 1           | <i>Acinetobacter</i> | Central blood            | 15h 54m                   | 66h 4m                       |
| 1           | <i>Acinetobacter</i> | Peripheral blood         | 24h 34m                   | 135h 41m                     |
| 2           | <i>Pseudomonas</i>   | Central blood            | 18h 19m                   | 59h 22m                      |
| 2           | <i>Pseudomonas</i>   | Peripheral blood         | 27h 14m                   |                              |
| 3           | <i>Klebsiella</i>    | Central blood red port   | 7h 6m                     |                              |
| 3           | <i>Klebsiella</i>    | Central blood white port | 5h 6m                     | 42h 16m                      |
| 3           | <i>Klebsiella</i>    | Peripheral blood         | 95h 7m                    |                              |
| 3           | <i>Klebsiella</i>    | Platelet product         | 1h 6m                     | 62h 21m                      |

Legend: AST = antimicrobial susceptibility testing.

**Supplemental Table 2: Sequencing reads collected per sample.**

| Case | Sample Name              | Day      | Time   | Total Reads | Pathogen Reads | Pathogen             |
|------|--------------------------|----------|--------|-------------|----------------|----------------------|
| 1    | H2O-1a                   | n/a      | n/a    | 12292       | 0              | <i>ACB complex</i>   |
| 1    | H2O-1b                   | n/a      | n/a    | 4196        | 0              | <i>ACB complex</i>   |
| 1    | Co-component-1           | n/a      | n/a    | 33437780    | 87             | <i>ACB complex</i>   |
| 1    | Co-component-2           | n/a      | n/a    | 105027102   | 190            | <i>ACB complex</i>   |
| 1    | Patient A                | Day (-1) | 5:01   | 111863490   | 58             | <i>ACB complex</i>   |
| 1    | Patient A                | Day 0    | 3:17   | 91789296    | 23             | <i>ACB complex</i>   |
| 1    | Patient A                | Day 1    | 4:52   | 86230676    | 91             | <i>ACB complex</i>   |
| 1    | Patient A                | Day 1    | 14:41a | 89397082    | 19092          | <i>ACB complex</i>   |
| 1    | Patient A                | Day 1    | 14:41b | 150000000   | 30666          | <i>ACB complex</i>   |
| 1    | Patient A                | Day 1    | 15:23  | 148209522   | 21096          | <i>ACB complex</i>   |
| 1    | H2O-2a                   | n/a      | n/a    | 5532686     | 1290           | <i>ACB complex</i>   |
| 1    | Transfused platelets     | n/a      | n/a    | 150000000   | 34367349       | <i>ACB complex</i>   |
| 1    | Isolate-a (Platelet bag) | n/a      | n/a    | 10273280    | -              | <i>ACB complex</i>   |
| 1    | isolate-b (Platelet bag) | n/a      | n/a    | 7746330     | -              | <i>ACB complex</i>   |
| 1    | isolate-c (Patient)      | n/a      | n/a    | 6458218     | -              | <i>ACB complex</i>   |
| 2    | H2O-1a                   | n/a      | n/a    | 56452       | 3              | <i>P. aeruginosa</i> |
| 2    | H2O-1b                   | n/a      | n/a    | 1427720     | 155            | <i>P. aeruginosa</i> |
| 2    | H2O-1c                   | n/a      | n/a    | 283232      | 32             | <i>P. aeruginosa</i> |
| 2    | Blood culture bottle-1   | Day 2    | 16:06  | 150000000   | 1223           | <i>P. aeruginosa</i> |
| 2    | Blood culture bottle-2   | Day 2    | 16:06  | 150000000   | 1533           | <i>P. aeruginosa</i> |
| 2    | H2O-2a                   | n/a      | n/a    | 9523090     | 399            | <i>P. aeruginosa</i> |
| 2    | Patient B                | Day 1    | 3:55   | 150000000   | 5              | <i>P. aeruginosa</i> |
| 2    | Patient B                | Day 1    | 21:09  | 150000000   | 81995          | <i>P. aeruginosa</i> |
| 2    | Patient B                | Day 2    | 3:49   | 118341948   | 4248           | <i>P. aeruginosa</i> |
| 2    | Patient B                | Day 2    | 11:36  | 99059392    | 875            | <i>P. aeruginosa</i> |
| 2    | Patient B                | Day 2    | 21:44  | 62467588    | 269            | <i>P. aeruginosa</i> |
| 2    | Patient B                | Day 2    | 23:19  | 83908304    | 178            | <i>P. aeruginosa</i> |
| 2    | Patient B                | Day 3    | 1:38   | 110713036   | 87             | <i>P. aeruginosa</i> |
| 2    | PRBC-1                   | n/a      | n/a    | 150000000   | 24             | <i>P. aeruginosa</i> |
| 2    | PRBC-2                   | n/a      | n/a    | 150000000   | 234            | <i>P. aeruginosa</i> |
| 3    | Patient C                | Day 1    | 4:35   | 125893204   | 31             | <i>K. pneumoniae</i> |
| 3    | Patient C                | Day 1    | 12:15  | 45615102    | 1255715        | <i>K. pneumoniae</i> |
| 3    | Patient D                | Day 1    | 0:59   | 10769438    | 42             | <i>K. pneumoniae</i> |
| 3    | Patient D                | Day 1    | 11:00  | 42995136    | 113123         | <i>K. pneumoniae</i> |
| 3    | H2O-1a                   | n/a      | n/a    | 2734220     | 217            | <i>K. pneumoniae</i> |
| 3    | Isolate-a (Patient C)    | n/a      | n/a    | 6601096     | -              | <i>K. pneumoniae</i> |
| 3    | Isolate-b (Platelet bag) | n/a      | n/a    | 5800012     | -              | <i>K. pneumoniae</i> |

**A**

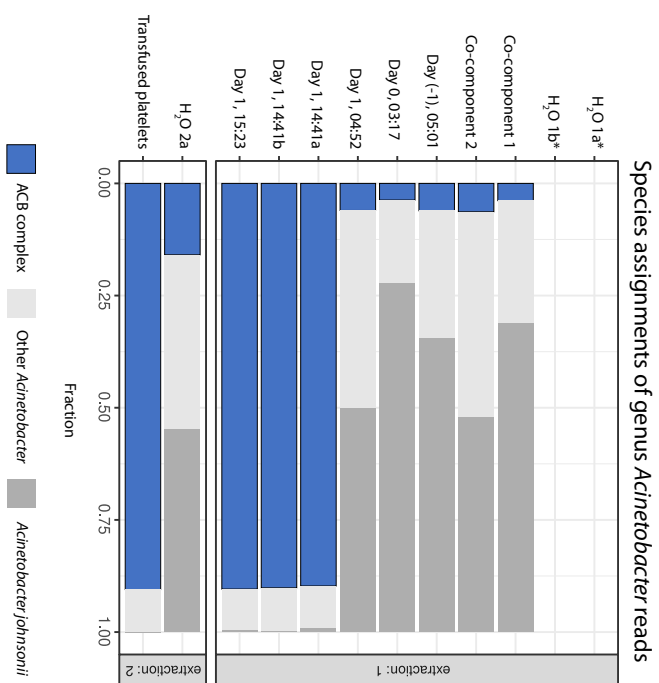

**B**

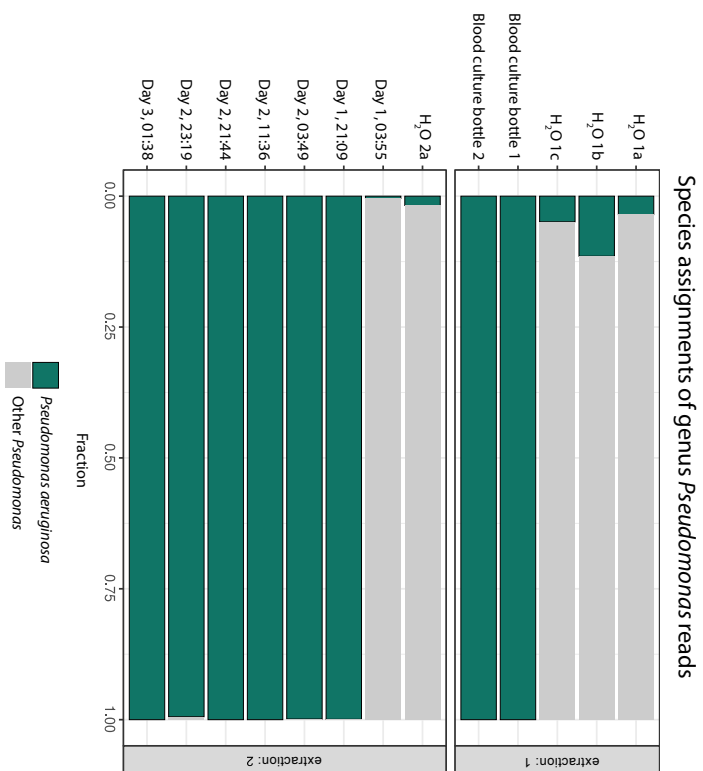

**Supplemental Figure 1. Fraction of species-specific sequencing reads aligning to transfusion-transmitted pathogens.**

**A)** Fraction of species-specific *Acinetobacter* read assignments for samples evaluated by culture-independent metagenomic sequencing in case 1, including water controls. The co-components and pre-transfusion samples (upper panel) had only a small fraction of genus *Acinetobacter* reads that best aligned to *Acinetobacter calcoaceticus/baumannii* (ACB) complex while the transfused product (lower panel) and patient's post-transfusion plasma (upper panel) was comprised mostly of reads aligning to the ACB complex. Asterisks indicate samples with no reads to genus *Acinetobacter*. **B)** Fraction of species-specific *Pseudomonas* sequencing read assignments for plasma samples evaluated by culture-independent metagenomic sequencing for case 2, including water controls. Samples from the blood culture bottles which eventually turned positive (upper panel) and from the patient's plasma post-transfusion (lower panel) were comprised almost entirely of reads best aligning to *Pseudomonas aeruginosa*, while the patient's plasma before transfusion and water control samples had mostly reads aligning to other *Pseudomonas* species.
